# Supplementary material
Source: Springer Nature journal article supplement (https://www.springermedizin.de/resource/supplementary/12957_2011_957_MOESM1_ESM.pdf/9562044)

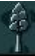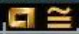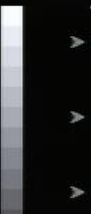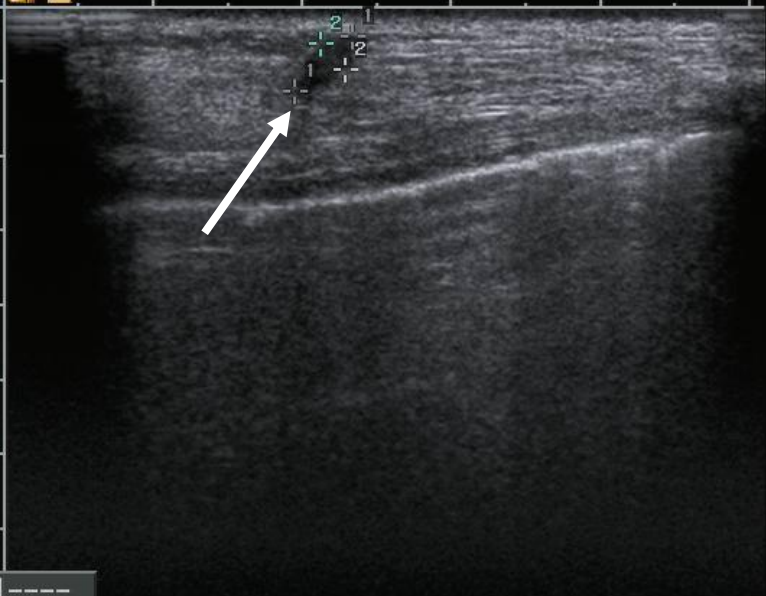

10:28:52 am  
 15L8w-S #32  
 14.0MHz 40mm  
 Breast  
 General  
 68dB S1/+2/3/2  
 Gain= -4dB Δ=2

----1----  
 Dist = 0.534cm  
 ----2----  
 Dist = 0.240cm

Delete Set

Lock Set

Select Set

Supplement: MOESM1 [file 9562044]
